# Supplementary material for: Seasonal comparison of bacterial communities in rhizosphere of alpine cushion plants in the Himalayan Hengduan Mountains
Source: PubMed Central journal article supplement — Plant Divers. 2018 Sep 19;40(5):209–16. doi: 10.1016/j.pld.2018.09.003 (PMC6224804; doi:10.1016/j.pld.2018.09.003), 2018-09-19
Supplement: mmc1.pdf [file mmc1.pdf]

## *Supplementary Materials*

### **Seasonal comparison of bacterial communities in rhizosphere of alpine cushion plants in the Himalayan Hengduan Mountains**

**Shuai Chang <sup>a, b</sup>, Jianguo Chen <sup>a</sup>, Jianqiang Su <sup>c\*</sup> & Yang Yang <sup>a\*</sup> & Hang Sun <sup>a\*</sup>**

<sup>a</sup> Key Laboratory for Plant Diversity and Biogeography of East Asia, Kunming Institute of Botany, Chinese Academy of Sciences, Kunming 650201, China

<sup>b</sup> University of Chinese Academy of Sciences, Beijing 100049, China

<sup>c</sup> Key Laboratory of Urban Environment and Health, Institute of Urban Environment, Chinese Academy of Sciences, Xiamen 361021, China

**\* Correspondence:**

**Hang Sun**, Kunming Institute of Botany, Chinese Academy of Sciences, Kunming, China, sunhang@mail.kib.ac.cn;

**Yang Yang**, Kunming Institute of Botany, Chinese Academy of Sciences, Kunming, China, yangyang@mail.kib.ac.cn;

**Jianqiang Su**, Institute of Urban Environment, Chinese Academy of Sciences, Xiamen, China, jqsu@iue.ac.cn.

The *Supplementary Materials* contains **2** figures and **4** tables.

# Contents

|                        |   |
|------------------------|---|
| <b>Figure S1</b> ..... | 1 |
| <b>Figure S2</b> ..... | 2 |
| <b>Table S1</b> .....  | 3 |
| <b>Table S2</b> .....  | 4 |
| <b>Table S3</b> .....  | 5 |
| <b>Table S4</b> .....  | 6 |

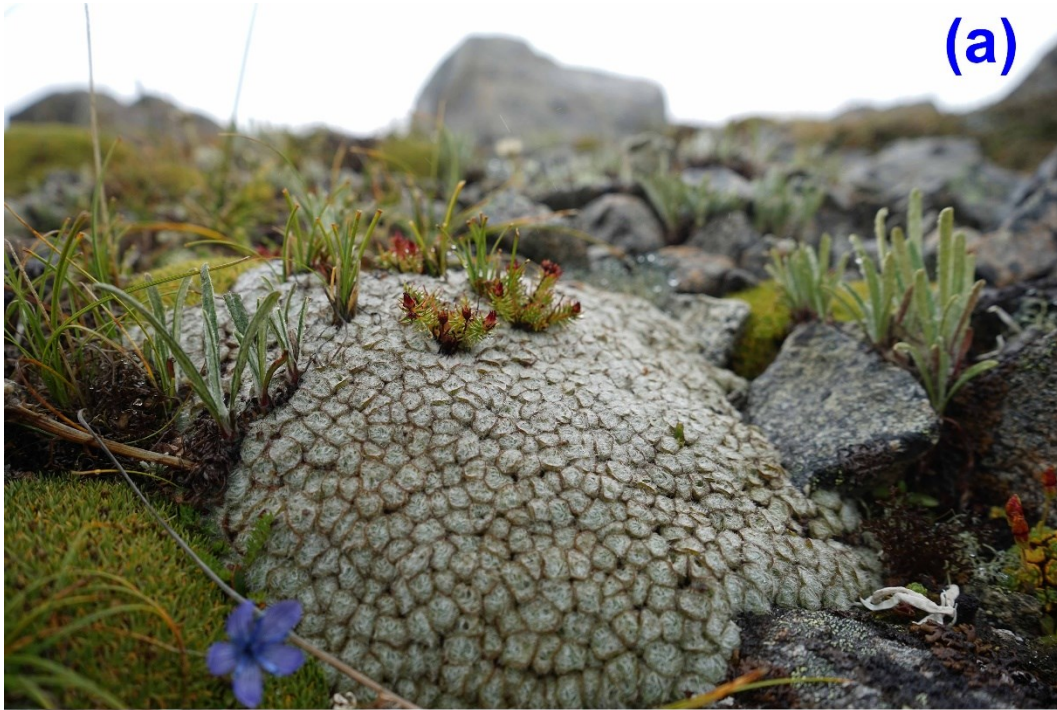

(a)

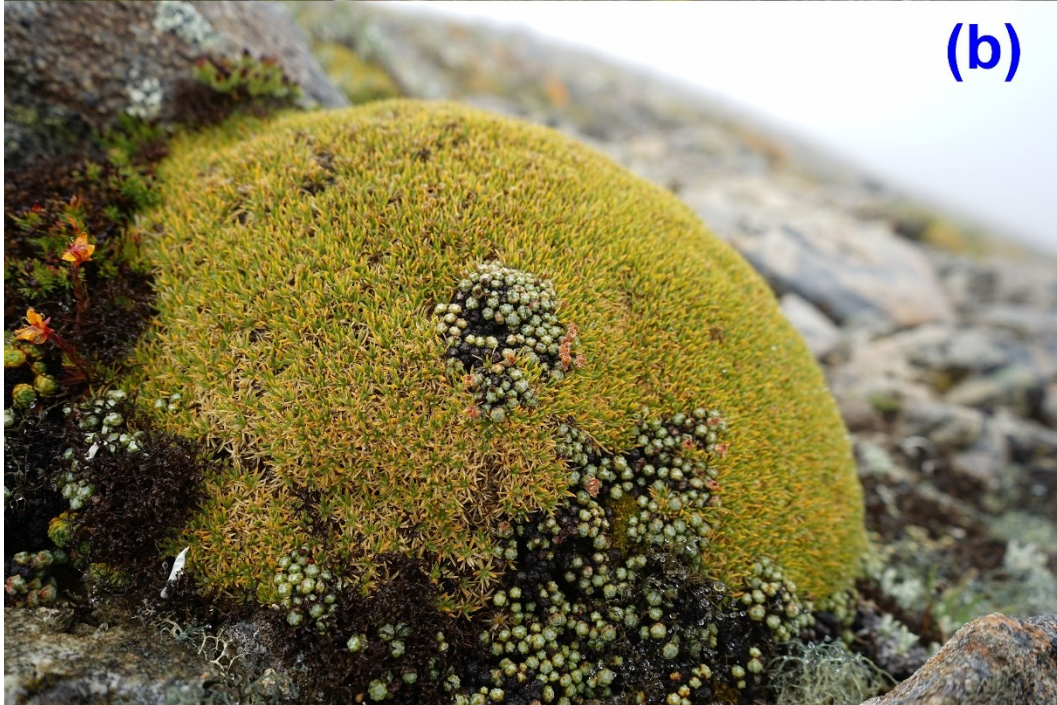

(b)

**Figure S1.** *Chionocharis hookeri* (a) and *Arenaria polytrichoides* (b) cushions occurring at 4780m elevation in the Sino-Himalayas.

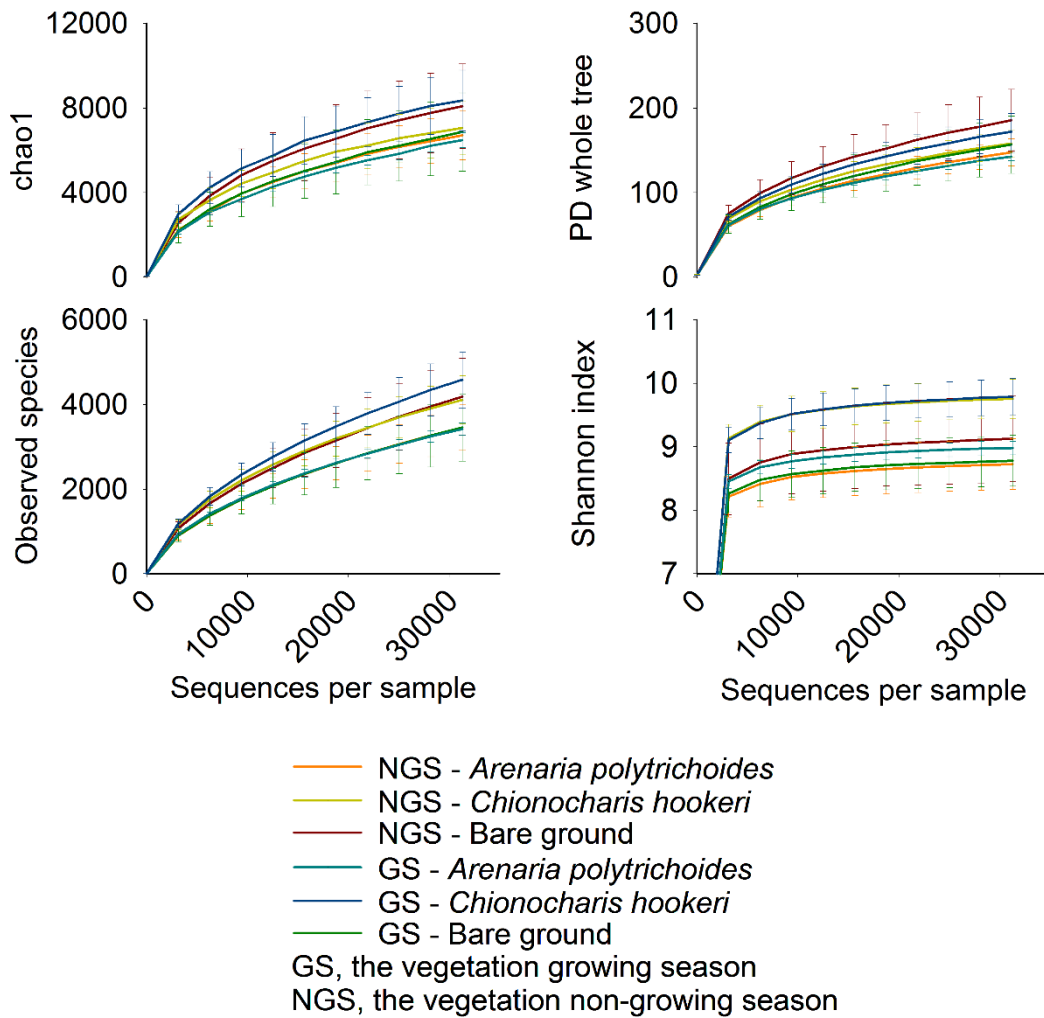

**Figure S2.** Rarefaction curves for alpha diversities of bacterial communities in the sequencing depth of 31290 reads. PD whole tree, chao1, observed species and Shannon indices were calculated with QIIME (1.7).

**Table S1.** Main information about the soil samples and sequencing datasets

| Sample ID <sup>1</sup> | Barcodes | Tags Number | Data production <sup>2</sup> (bp) | Effective Reads Number | OTUs |
|------------------------|----------|-------------|-----------------------------------|------------------------|------|
| NGS-B1                 | AACCAACC | 44974       | 6248804                           | 42395                  | 6024 |
| NGS-B2                 | AACCAAGG | 48633       | 6815747                           | 46047                  | 5349 |
| NGS-B3                 | AACCATCG | 52522       | 7316053                           | 52069                  | 3422 |
| NGS-B4                 | AACCATGC | 98724       | 13750775                          | 93761                  | 8047 |
| NGS-A1                 | AACCGCAT | 55934       | 7840761                           | 54074                  | 5574 |
| NGS-A2                 | AACCGCTA | 51780       | 7155382                           | 50941                  | 3651 |
| NGS-A3                 | AACCGGAA | 31783       | 4413605                           | <b>31290</b>           | 3083 |
| NGS-A4                 | AACCGGTT | 51466       | 7248564                           | 50008                  | 4778 |
| NGS-C1                 | AACCTACG | 44730       | 6374115                           | 43311                  | 5419 |
| NGS-C2                 | AACCTAGC | 45054       | 6428873                           | 43768                  | 4897 |
| NGS-C3                 | AACCTTCC | 38384       | 5501272                           | 37484                  | 3420 |
| NGS-C4                 | AACCTTGG | 38065       | 5433070                           | 36270                  | 4806 |
| GS-B1                  | AACGAACG | 58090       | 8042489                           | 55900                  | 4874 |
| GS-B2                  | AACGAAGC | 37701       | 5234262                           | 35639                  | 5063 |
| GS-B3                  | AACGATCC | 38234       | 5307182                           | 37844                  | 3007 |
| GS-B4                  | AACGATGG | 41090       | 5704012                           | 40514                  | 3186 |
| GS-A1                  | AACCATCG | 46465       | 6509035                           | 45763                  | 4337 |
| GS-A2                  | AACCATGC | 47930       | 6764899                           | 47191                  | 3896 |
| GS-A3                  | AACCGCAT | 50295       | 7020316                           | 49426                  | 4393 |
| GS-A4                  | AACCGCTA | 53635       | 7553831                           | 52403                  | 4446 |
| GS-C1                  | AACCGGAA | 49561       | 6988657                           | 47870                  | 6065 |
| GS-C2                  | AACCGGTT | 48125       | 6745817                           | 44983                  | 6672 |
| GS-C3                  | AACCTACG | 37283       | 5263844                           | 36282                  | 4275 |
| GS-C4                  | AACCTAGC | 36827       | 5222373                           | 36109                  | 4263 |

<sup>1</sup> A = *Arenaria polytrichoides*; C = *Chionocharis hookeri*; B = bare ground; GS, the vegetation growing season; NGS, the vegetation non-growing season; numbers behind letters mean the repetitions.

<sup>2</sup> Data production = the total length of all tags within the sample.

**Table S2.** Primary scripts used during the sequence processing

---

| <b>Scripts</b>                     |
|------------------------------------|
| add_qiime_labels.py                |
| count_seqs.py                      |
| pick_de_novo_otus.py               |
| filter_otus_from_otu_table.py      |
| parallel_identify_chimeric_seqs.py |
| filter_fasta.py                    |
| make_otu_table.py                  |
| convert_biom.py                    |
| filter_alignment.py                |
| make_phylogeny.py                  |
| make_otu_heatmap_html.py           |
| make_otu_network.py                |
| summarize_taxa_through_plots.py    |
| print_biom_table_summary.py        |
| alpha_rarefaction.py               |
| beta_diversity_through_plots.py    |
| jackknifed_beta_diversity.py       |
| make_bootstrapped_tree.py          |
| compare_categories.py              |
| shared_phylotypes.py               |
| summarize_otu_by_cat.py            |
| otu_category_significance.py       |
| compare_alpha_diversity.py         |
| compare_distance_matrices.py       |
| make_distance_boxplots.py          |

---

**Table S3.** Spearman's correlation coefficient among the bacterial phyla and the microhabitats and the seasons

| Abiotic factors<br>Bacterial phyla | Microhabitats <sup>1</sup> | Seasons <sup>2</sup> |
|------------------------------------|----------------------------|----------------------|
| Proteobacteria                     | 0.871**                    | -0.048               |
| Actinobacteria                     | 0.434*                     | -0.301               |
| Acidobacteria                      | -0.038                     | 0.277                |
| Chloroflexi                        | -0.677**                   | 0.325                |
| AD3                                | -0.690**                   | 0.506*               |
| Bacteroidetes                      | 0.421*                     | -0.590**             |
| Verrucomicrobia                    | 0.102                      | 0.265                |
| WPS2                               | -0.817**                   | 0.120                |
| Planctomycetes                     | -0.562**                   | -0.217               |
| Gemmatimonadetes                   | -0.741**                   | -0.157               |
| Cyanobacteria                      | -0.306                     | -0.530**             |
| TM7                                | 0.460*                     | -0.421*              |
| Firmicutes                         | -0.306                     | 0.169                |

<sup>1</sup> The rhizosphere of the cushion plants and the bare ground;

<sup>2</sup> The vegetation growing season and the vegetation non-growing season.

**Table S4.** Average relative abundances of phyla detected in soils at the study site

| Taxa detected                   | Average Relative Abundances <sup>1</sup> |          |          |          |          |          |
|---------------------------------|------------------------------------------|----------|----------|----------|----------|----------|
|                                 | GS-A                                     | NGS-A    | GS-C     | NGS-C    | GS-B     | NGS-B    |
| k__Bacteria;Other               | 0.015424                                 | 0.020963 | 0.022867 | 0.024665 | 0.037628 | 0.045406 |
| k__Bacteria;p__AD3              | 0.011857                                 | 0.003763 | 0.023682 | 0.001095 | 0.170376 | 0.032648 |
| k__Bacteria;p__Acidobacteria    | 0.172673                                 | 0.162583 | 0.125343 | 0.107407 | 0.149862 | 0.133556 |
| k__Bacteria;p__Actinobacteria   | 0.283714                                 | 0.335121 | 0.362018 | 0.358911 | 0.165354 | 0.308879 |
| k__Bacteria;p__Armatimonadetes  | 0.000443                                 | 0.000307 | 0.000271 | 0.000260 | 0.000434 | 0.000550 |
| k__Bacteria;p__BRC1             | 0.000005                                 | 0.000005 | 0.000028 | 0.000019 | 0.000000 | 0.000016 |
| k__Bacteria;p__Bacteroidetes    | 0.016889                                 | 0.022256 | 0.014694 | 0.039323 | 0.004601 | 0.016430 |
| k__Bacteria;p__Caldithrix       | 0.000000                                 | 0.000000 | 0.000014 | 0.000007 | 0.000006 | 0.000000 |
| k__Bacteria;p__Chlamydiae       | 0.001816                                 | 0.001355 | 0.001624 | 0.001748 | 0.000452 | 0.000398 |
| k__Bacteria;p__Chlorobi         | 0.000432                                 | 0.000244 | 0.000264 | 0.000398 | 0.000289 | 0.000690 |
| k__Bacteria;p__Chloroflexi      | 0.071490                                 | 0.041464 | 0.072872 | 0.053882 | 0.134008 | 0.106258 |
| k__Bacteria;p__Cyanobacteria    | 0.002050                                 | 0.003941 | 0.001326 | 0.002842 | 0.003026 | 0.012973 |
| k__Bacteria;p__Elusimicrobia    | 0.002600                                 | 0.001939 | 0.001260 | 0.001102 | 0.000716 | 0.001006 |
| k__Bacteria;p__FCPU426          | 0.000113                                 | 0.000055 | 0.000014 | 0.000000 | 0.000056 | 0.000180 |
| k__Bacteria;p__Fibrobacteres    | 0.000037                                 | 0.000081 | 0.000061 | 0.000191 | 0.000000 | 0.000046 |
| k__Bacteria;p__Firmicutes       | 0.001568                                 | 0.000879 | 0.006523 | 0.005472 | 0.002490 | 0.000690 |
| k__Bacteria;p__Fusobacteria     | 0.000015                                 | 0.000008 | 0.000014 | 0.000000 | 0.000000 | 0.000000 |
| k__Bacteria;p__GAL15            | 0.000011                                 | 0.000000 | 0.000110 | 0.000000 | 0.000399 | 0.000055 |
| k__Bacteria;p__GN02             | 0.000179                                 | 0.000083 | 0.000206 | 0.000718 | 0.000030 | 0.000414 |
| k__Bacteria;p__GOUTA4           | 0.000000                                 | 0.000000 | 0.000054 | 0.000034 | 0.000000 | 0.000000 |
| k__Bacteria;p__Gemmatimonadetes | 0.007029                                 | 0.008834 | 0.006848 | 0.007686 | 0.018250 | 0.025958 |
| k__Bacteria;p__MVP-21           | 0.000000                                 | 0.000000 | 0.000000 | 0.000013 | 0.000000 | 0.000000 |



|                                |          |          |          |          |          |          |
|--------------------------------|----------|----------|----------|----------|----------|----------|
| k__Bacteria;p__NKB19           | 0.000000 | 0.000000 | 0.000000 | 0.000027 | 0.000000 | 0.000000 |
| k__Bacteria;p__Nitrospirae     | 0.000986 | 0.000412 | 0.004903 | 0.001507 | 0.003646 | 0.002351 |
| k__Bacteria;p__OD1             | 0.001727 | 0.000848 | 0.000907 | 0.000957 | 0.000265 | 0.000902 |
| k__Bacteria;p__OP3             | 0.000381 | 0.000220 | 0.000250 | 0.000195 | 0.000039 | 0.000025 |
| k__Bacteria;p__OP8             | 0.000000 | 0.000000 | 0.000028 | 0.000000 | 0.000000 | 0.000000 |
| k__Bacteria;p__OP9             | 0.000005 | 0.000000 | 0.000007 | 0.000000 | 0.000117 | 0.000320 |
| k__Bacteria;p__Planctomycetes  | 0.012657 | 0.016478 | 0.006341 | 0.009265 | 0.013993 | 0.018101 |
| k__Bacteria;p__Proteobacteria  | 0.370274 | 0.359314 | 0.321553 | 0.341177 | 0.244857 | 0.235930 |
| k__Bacteria;p__TM6             | 0.000295 | 0.000206 | 0.000233 | 0.000112 | 0.000084 | 0.000037 |
| k__Bacteria;p__TM7             | 0.002990 | 0.002932 | 0.004556 | 0.010496 | 0.001035 | 0.003472 |
| k__Bacteria;p__Tenericutes     | 0.001438 | 0.001720 | 0.000872 | 0.000173 | 0.000027 | 0.000962 |
| k__Bacteria;p__Thermi          | 0.000000 | 0.000000 | 0.000000 | 0.000012 | 0.000061 | 0.000165 |
| k__Bacteria;p__Verrucomicrobia | 0.014528 | 0.008583 | 0.017048 | 0.029230 | 0.018877 | 0.010006 |
| k__Bacteria;p__WPS-2           | 0.006284 | 0.005300 | 0.002637 | 0.000393 | 0.028783 | 0.041144 |
| k__Bacteria;p__WS2             | 0.000032 | 0.000029 | 0.000110 | 0.000196 | 0.000116 | 0.000000 |
| k__Bacteria;p__WS3             | 0.000032 | 0.000061 | 0.000426 | 0.000383 | 0.000016 | 0.000049 |
| k__Bacteria;p__WYO             | 0.000025 | 0.000018 | 0.000035 | 0.000104 | 0.000107 | 0.000383 |

<sup>1</sup>A = *Arenaria polytrichoides*; C = *Chionocharis hookeri*; B = bare ground; GS, the vegetation growing season; NGS, the vegetation non-growing season.
